# Supplementary material for: Proline-Based Carbamates as Cholinesterase Inhibitors
Source: PubMed Central journal article supplement (PMC6150311; doi:10.3390/molecules22111969), 2017-11-14
Supplement: molecules-22-01969-s001.pdf [file molecules-22-01969-s001.pdf]

## Supplementary Materials

Table S1.

| L.p.      | Polar surface area | Polar volume | Surface area | Volume   | Acceptor count (sybyl) | Atom count | Bond count | Donor count (sybyl) | Hydrophobe count | Rotatable Bond count | Acceptor Mount (Lipinski) | ClogP  | Donor Mount (Lipinski) | Lipinski violations | Molecular weight |
|-----------|--------------------|--------------|--------------|----------|------------------------|------------|------------|---------------------|------------------|----------------------|---------------------------|--------|------------------------|---------------------|------------------|
| <b>1</b>  | 49.446             | 148.212      | 605.397      | 1006.661 | 3                      | 44         | 46         | 1                   | 3                | 6                    | 5                         | 4.1632 | 1                      | 0                   | 324.3737         |
| <b>2a</b> | 51.491             | 160.579      | 648.635      | 1063.791 | 4                      | 48         | 50         | 1                   | 3                | 7                    | 6                         | 3.6486 | 1                      | 0                   | 354.3997         |
| <b>2b</b> | 61.506             | 165.704      | 653.223      | 1083.814 | 4                      | 48         | 50         | 1                   | 3                | 7                    | 6                         | 4.2386 | 1                      | 0                   | 354.3997         |
| <b>2c</b> | 61.876             | 148.051      | 653.419      | 1073.462 | 4                      | 48         | 50         | 1                   | 3                | 7                    | 6                         | 4.2386 | 1                      | 0                   | 354.3997         |
| <b>3a</b> | 45.255             | 141.705      | 623.038      | 1038.938 | 3                      | 47         | 49         | 1                   | 3                | 6                    | 5                         | 4.0122 | 1                      | 0                   | 338.4003         |
| <b>3b</b> | 49.460             | 129.946      | 636.949      | 1050.936 | 3                      | 47         | 49         | 1                   | 3                | 6                    | 5                         | 4.6622 | 1                      | 0                   | 338.4003         |
| <b>3c</b> | 49.466             | 132.090      | 637.767      | 1050.962 | 3                      | 47         | 49         | 1                   | 3                | 6                    | 5                         | 4.6622 | 1                      | 0                   | 338.4003         |
| <b>4a</b> | 48.435             | 144.032      | 610.640      | 1018.047 | 3                      | 44         | 46         | 1                   | 3                | 6                    | 5                         | 3.9638 | 1                      | 0                   | 342.3642         |
| <b>4b</b> | 49.474             | 131.146      | 614.901      | 1012.274 | 3                      | 44         | 46         | 1                   | 3                | 6                    | 5                         | 4.5638 | 1                      | 0                   | 342.3642         |
| <b>4c</b> | 49.441             | 144.623      | 614.922      | 1021.213 | 3                      | 44         | 46         | 1                   | 3                | 6                    | 5                         | 4.5638 | 1                      | 0                   | 342.3642         |
| <b>5a</b> | 48.725             | 135.310      | 618.371      | 1030.333 | 3                      | 44         | 46         | 1                   | 3                | 6                    | 5                         | 4.2838 | 1                      | 0                   | 358.8188         |
| <b>5b</b> | 49.486             | 134.686      | 628.707      | 1042.689 | 3                      | 44         | 46         | 1                   | 3                | 6                    | 5                         | 5.1338 | 1                      | 1                   | 358.8188         |
| <b>5c</b> | 49.435             | 133.841      | 628.664      | 1038.846 | 3                      | 44         | 46         | 1                   | 3                | 6                    | 5                         | 5.1338 | 1                      | 1                   | 358.8188         |
| <b>6a</b> | 49.183             | 137.829      | 621.311      | 1038.864 | 3                      | 44         | 46         | 1                   | 3                | 6                    | 5                         | 4.4038 | 1                      | 0                   | 403.2698         |
| <b>6b</b> | 49.440             | 137.166      | 633.526      | 1053.128 | 3                      | 44         | 46         | 1                   | 3                | 6                    | 5                         | 5.2838 | 1                      | 1                   | 403.2698         |
| <b>6c</b> | 49.462             | 133.509      | 633.536      | 1046.658 | 3                      | 44         | 46         | 1                   | 3                | 6                    | 5                         | 5.2838 | 1                      | 1                   | 403.2698         |
| <b>7a</b> | 42.920             | 142.558      | 636.372      | 1076.084 | 3                      | 47         | 49         | 1                   | 4                | 6                    | 5                         | 4.0470 | 1                      | 0                   | 392.3717         |
| <b>7b</b> | 49.450             | 118.742      | 659.789      | 1088.469 | 3                      | 47         | 49         | 1                   | 4                | 6                    | 5                         | 5.4970 | 1                      | 1                   | 392.3717         |
| <b>7c</b> | 49.438             | 124.821      | 660.914      | 1079.248 | 3                      | 47         | 49         | 1                   | 4                | 6                    | 5                         | 5.4970 | 1                      | 1                   | 392.3717         |
| <b>8a</b> | 110.799            | 195.483      | 623.940      | 1045.108 | 5                      | 46         | 48         | 1                   | 3                | 7                    | 8                         | 0.8712 | 1                      | 0                   | 369.3713         |
| <b>8b</b> | 134.854            | 207.158      | 641.084      | 1063.287 | 5                      | 46         | 48         | 1                   | 3                | 7                    | 8                         | 0.8712 | 1                      | 0                   | 369.3713         |
| <b>8c</b> | 134.702            | 209.563      | 641.602      | 1057.242 | 5                      | 46         | 48         | 1                   | 3                | 7                    | 8                         | 0.8712 | 1                      | 0                   | 369.3713         |
| <b>9a</b> | 93.856             | 164.611      | 614.104      | 1021.122 | 4                      | 45         | 47         | 2                   | 3                | 6                    | 6                         | 3.7262 | 2                      | 0                   | 340.3731         |
| <b>9b</b> | 105.477            | 172.921      | 619.746      | 1034.721 | 4                      | 45         | 47         | 2                   | 3                | 6                    | 6                         | 3.4962 | 2                      | 0                   | 340.3731         |
| <b>9c</b> | 105.171            | 173.231      | 619.497      | 1023.670 | 4                      | 45         | 47         | 2                   | 3                | 6                    | 6                         | 3.4962 | 2                      | 0                   | 340.3731         |
